# Supplementary material for: Development and pilot implementation of a standardised trauma documentation form to inform a national trauma registry in a low-resource setting: lessons from Tanzania
Source: HighWire-hosted journal article supplement (doi:10.1136/bmjopen-2020-038022), 2020-10-01
Supplement: bmjopen-2020-038022supp001_data_supplement.pdf [file bmjopen-2020-038022supp001_data_supplement.pdf]

| REGIONAL REFERRAL HOSPITAL CASUALTY TRAUMA FORM             |                  |                                                                                                                                                                                                                                                                                                                                                                                                                 |                                | <input type="checkbox"/> Mass Casualty |
|-------------------------------------------------------------|------------------|-----------------------------------------------------------------------------------------------------------------------------------------------------------------------------------------------------------------------------------------------------------------------------------------------------------------------------------------------------------------------------------------------------------------|--------------------------------|----------------------------------------|
| Hospital Registration Number:                               |                  | Date: / /                                                                                                                                                                                                                                                                                                                                                                                                       | Time of Arrival: __ : __ (24h) |                                        |
| Patient Surname: _____<br>First Name: _____                 |                  | <b>Arrival Mode:</b> <input type="checkbox"/> Ambulance <input type="checkbox"/> Car ( <i>circle private or Taxi</i> )<br><input type="checkbox"/> Walk-in <input type="checkbox"/> Motorcycle <input type="checkbox"/> Tricycle ( <i>circle private or Taxi</i> )<br><input type="checkbox"/> Public transport <input type="checkbox"/> Police <input type="checkbox"/> Bicycle <input type="checkbox"/> Other |                                |                                        |
| Date of Birth: / /                                          | Age: _____       | <input type="checkbox"/> Self Referral <input type="checkbox"/> Referred from: _____                                                                                                                                                                                                                                                                                                                            |                                |                                        |
| Sex: M / F                                                  | Weight: _____ kg |                                                                                                                                                                                                                                                                                                                                                                                                                 |                                |                                        |
| Occupation: _____ <input type="checkbox"/> Unknown          |                  | Contact Person: _____                                                                                                                                                                                                                                                                                                                                                                                           |                                |                                        |
| Residential address: _____ <input type="checkbox"/> Unknown |                  | Phone: _____ Relation: _____                                                                                                                                                                                                                                                                                                                                                                                    |                                |                                        |

**CHIEF COMPLAINT:** \_\_\_\_\_

**Triage Category:**  Emergency  
 Priority  
 Queue

Dead on arrival

**INITIAL VITAL SIGNS:** at \_\_\_\_ : \_\_\_\_ (24h format) BP: \_\_\_\_ / \_\_\_\_ HR: \_\_\_\_ RR: \_\_\_\_ SpO<sub>2</sub>: \_\_\_\_ % on \_\_\_\_ Temp: \_\_\_\_ °C

| PRIMARY SURVEY                                                                                                                                                                                                                                                                                                                                                                                                                                                                                                                                                                                                                                                                                                                                                                                                                                                                                                                                                                                                                                                                                                                                                                                                                               |                                                                                                                                                                                                                                                                                                                                                                                                                                                                                                                                                                                               |                                                                                                                                                                                                                                                                                                                                                                                                                                                                                                                                                                                                                                                                                                                                                                                                                                                                                                                                                                                                                                                                                                                                                                                                                                                                          |                                                                                                                                                                |
|----------------------------------------------------------------------------------------------------------------------------------------------------------------------------------------------------------------------------------------------------------------------------------------------------------------------------------------------------------------------------------------------------------------------------------------------------------------------------------------------------------------------------------------------------------------------------------------------------------------------------------------------------------------------------------------------------------------------------------------------------------------------------------------------------------------------------------------------------------------------------------------------------------------------------------------------------------------------------------------------------------------------------------------------------------------------------------------------------------------------------------------------------------------------------------------------------------------------------------------------|-----------------------------------------------------------------------------------------------------------------------------------------------------------------------------------------------------------------------------------------------------------------------------------------------------------------------------------------------------------------------------------------------------------------------------------------------------------------------------------------------------------------------------------------------------------------------------------------------|--------------------------------------------------------------------------------------------------------------------------------------------------------------------------------------------------------------------------------------------------------------------------------------------------------------------------------------------------------------------------------------------------------------------------------------------------------------------------------------------------------------------------------------------------------------------------------------------------------------------------------------------------------------------------------------------------------------------------------------------------------------------------------------------------------------------------------------------------------------------------------------------------------------------------------------------------------------------------------------------------------------------------------------------------------------------------------------------------------------------------------------------------------------------------------------------------------------------------------------------------------------------------|----------------------------------------------------------------------------------------------------------------------------------------------------------------|
| <b>A</b> irway<br><input type="checkbox"/> NORMAL                                                                                                                                                                                                                                                                                                                                                                                                                                                                                                                                                                                                                                                                                                                                                                                                                                                                                                                                                                                                                                                                                                                                                                                            | <b>Physical findings</b><br><input type="checkbox"/> Angioedema <input type="checkbox"/> Stridor <input type="checkbox"/> Voice changes<br><input type="checkbox"/> Oral/Airway burns<br><b>Obstructed by:</b> <input type="checkbox"/> Tongue <input type="checkbox"/> Blood <input type="checkbox"/> Secretions <input type="checkbox"/> Vomit <input type="checkbox"/> Foreign body                                                                                                                                                                                                        | <b>Interventions done</b><br><b>Airway Manipulation:</b> <input type="checkbox"/> Repositioning <input type="checkbox"/> Suction<br><b>Airway:</b> <input type="checkbox"/> Oral Airway <input type="checkbox"/> Nasal Airway <input type="checkbox"/> laryngeal mask airway<br><input type="checkbox"/> Endotracheal intubation<br><b>Cervical collar:</b> <input type="checkbox"/> None needed <input type="checkbox"/> Placed before arrival<br><input type="checkbox"/> Placed at casualty                                                                                                                                                                                                                                                                                                                                                                                                                                                                                                                                                                                                                                                                                                                                                                           |                                                                                                                                                                |
|                                                                                                                                                                                                                                                                                                                                                                                                                                                                                                                                                                                                                                                                                                                                                                                                                                                                                                                                                                                                                                                                                                                                                                                                                                              | <b>B</b> reathing<br><input type="checkbox"/> NORMAL<br><b>Spontaneous Respiration:</b> <input type="checkbox"/> Yes <input type="checkbox"/> No<br><b>Chest Rise:</b> <input type="checkbox"/> Shallow <input type="checkbox"/> Retractions <input type="checkbox"/> Paradoxical<br><b>Trachea:</b> <input type="checkbox"/> Midline <input type="checkbox"/> Deviated to <input type="checkbox"/> L <input type="checkbox"/> R<br><b>Breath Sounds:</b> Abnormal: <input type="checkbox"/> L ____ <input type="checkbox"/> R ____                                                           | <b>Given Oxygen:</b> ____ L<br><input type="checkbox"/> Nasal Cannula <input type="checkbox"/> Mask<br><input type="checkbox"/> Non-rebreather mask <input type="checkbox"/> Bag valve Mask <input type="checkbox"/> CPAP <input type="checkbox"/> Ventilator                                                                                                                                                                                                                                                                                                                                                                                                                                                                                                                                                                                                                                                                                                                                                                                                                                                                                                                                                                                                            | <b>Chest tube/Needle (circle):</b><br><input type="checkbox"/> L -Size: ____<br>Depth: ____ cm<br><input type="checkbox"/> Right -Size: ____<br>Depth: ____ cm |
| <b>C</b> irculation<br><input type="checkbox"/> NORMAL<br><b>Skin:</b> <input type="checkbox"/> Warm <input type="checkbox"/> Dry<br><input type="checkbox"/> Pale <input type="checkbox"/> Cyanotic <input type="checkbox"/> Moist <input type="checkbox"/> Cool<br><b>Capillary refill:</b> <input type="checkbox"/> <2 sec <input type="checkbox"/> ≥2 sec<br><b>Pulses:</b> <input type="checkbox"/> Weak <input type="checkbox"/> Asymmetric<br><b>Jugular Venous Distension:</b> <input type="checkbox"/> Yes <input type="checkbox"/> No                                                                                                                                                                                                                                                                                                                                                                                                                                                                                                                                                                                                                                                                                              | <input type="checkbox"/> Bleeding controlled (bandage, tourniquet, direct pressure)<br><b>Access:</b> <input type="checkbox"/> Intravenous Location ____ cannula Size ____ G<br><input type="checkbox"/> Central Line Location ____ Size ____ G<br><input type="checkbox"/> Intraosseous Line: Location ____ Size ____ G<br><b>Intravenous Fluid:</b> ____ mL <input type="checkbox"/> NS <input type="checkbox"/> RL <input type="checkbox"/> DNS <input type="checkbox"/> Dextrose<br><input type="checkbox"/> Blood ordered <input type="checkbox"/> Pelvic binder placed                  |                                                                                                                                                                                                                                                                                                                                                                                                                                                                                                                                                                                                                                                                                                                                                                                                                                                                                                                                                                                                                                                                                                                                                                                                                                                                          |                                                                                                                                                                |
| <b>D</b> isability<br><input type="checkbox"/> NORMAL<br><b>Blood glucose:</b> ____ mmol/l <input type="checkbox"/> Glucose given<br><b>Responsiveness:</b> <input type="checkbox"/> A <input type="checkbox"/> V <input type="checkbox"/> P <input type="checkbox"/> U<br><b>GCS:</b> ____ / 15 (E ____ V ____ M ____)<br><b>Moves Extremities:</b> <input type="checkbox"/> LUE <input type="checkbox"/> RUE <input type="checkbox"/> LLE <input type="checkbox"/> RLE<br><b>E</b> xposure<br><input type="checkbox"/> NORMAL<br><b>Pupils:</b> L ____ mm → ____ mm R ____ mm → ____ mm<br><input type="checkbox"/> Patient has been Exposed completely                                                                                                                                                                                                                                                                                                                                                                                                                                                                                                                                                                                    | <b>Focused Assessment with Sonography in Trauma (FAST)</b><br><b>FAST</b><br><input type="checkbox"/> NORMAL<br><input type="checkbox"/> Not Indicated<br><input type="checkbox"/> Not done<br><b>Peritoneum</b><br><input type="checkbox"/> Negative <input type="checkbox"/> free fluid <input type="checkbox"/> Indeterminate<br><b>Chest</b><br><input type="checkbox"/> Negative <input type="checkbox"/> Indeterminate<br><input type="checkbox"/> Pneumothorax ____ (Right/le)<br><input type="checkbox"/> Pleural fluid ____ (Right/le)<br><input type="checkbox"/> Pericardial fluid |                                                                                                                                                                                                                                                                                                                                                                                                                                                                                                                                                                                                                                                                                                                                                                                                                                                                                                                                                                                                                                                                                                                                                                                                                                                                          |                                                                                                                                                                |
| <b>HISTORY OF PRESENT ILLNESS</b> Date of Injury: / /                                                                                                                                                                                                                                                                                                                                                                                                                                                                                                                                                                                                                                                                                                                                                                                                                                                                                                                                                                                                                                                                                                                                                                                        |                                                                                                                                                                                                                                                                                                                                                                                                                                                                                                                                                                                               |                                                                                                                                                                                                                                                                                                                                                                                                                                                                                                                                                                                                                                                                                                                                                                                                                                                                                                                                                                                                                                                                                                                                                                                                                                                                          |                                                                                                                                                                |
| <b>Place of injury:</b> _____ <input type="checkbox"/> Unknown<br><b>Patient's activity at time of injury:</b> _____ <input type="checkbox"/> Unknown<br><b>Mechanism of injury:</b><br><input type="checkbox"/> Road traffic incident: <input type="checkbox"/> Driver <input type="checkbox"/> Passenger <input type="checkbox"/> Pedestrian<br><input type="checkbox"/> Airbag <input type="checkbox"/> Seat belt <input type="checkbox"/> Other vehicle restraint <input type="checkbox"/> Helmet<br><input type="checkbox"/> Extricated Vehicle involved: _____<br><input type="checkbox"/> Ejected Crashed with: _____<br><input type="checkbox"/> Fall from: _____ <input type="checkbox"/> Hit by falling object: _____<br><input type="checkbox"/> Stab/Cut <input type="checkbox"/> Gunshot <input type="checkbox"/> Sexual Assault<br><input type="checkbox"/> Other blunt force trauma (struck/hit): _____<br><input type="checkbox"/> Suffocation, choking, hanging<br><input type="checkbox"/> Drowning: _____ Flotation device: Y / N<br><input type="checkbox"/> Burn caused by: _____<br><input type="checkbox"/> Poisoning/Toxic Exposure: _____<br><input type="checkbox"/> Unknown <input type="checkbox"/> Other: _____ |                                                                                                                                                                                                                                                                                                                                                                                                                                                                                                                                                                                               | <b>First care sought before arrival at the Casualty</b><br><input type="checkbox"/> None <input type="checkbox"/> Layperson first aid <input type="checkbox"/> Health care provider<br><b>Care given:</b> _____<br><b>Other Details of Incident</b><br><input type="checkbox"/> Loss of Consciousness <input type="checkbox"/> <5 min <input type="checkbox"/> 5-29 min <input type="checkbox"/> 30-24hr <input type="checkbox"/> >24 hr<br><input type="checkbox"/> Head trauma Yes / NO <input type="checkbox"/> Neck trauma Yes / NO<br><input type="checkbox"/> Other: _____<br><b>Hours since last Meal:</b> _____ <input type="checkbox"/> Unknown<br><b>Intent:</b> <input type="checkbox"/> Unintentional or accidental <input type="checkbox"/> Intentional: <input type="checkbox"/> Self harm <input type="checkbox"/> Legal process, political unrest or war <input type="checkbox"/> Unknown<br><input type="checkbox"/> Assault [Assaulted by: _____]<br><b>Substance use within 6 hours of injury:</b><br><input type="checkbox"/> Unknown <input type="checkbox"/> None <input type="checkbox"/> Reported <input type="checkbox"/> Evidence (positive test or clinical findings) <input type="checkbox"/> Alcohol <input type="checkbox"/> Others: _____ |                                                                                                                                                                |

| PAST MEDICAL HISTORY                                                                                                                                                                                                                                                                                                                                                                                                                                                                                                                                                                                                                                                                                                                                                                                                                                          |                                                                                                                                                                                                                                                                                                                                                                                                                               |                                                                                                                                                                                                                                                                                                                                                                                                                                                            |
|---------------------------------------------------------------------------------------------------------------------------------------------------------------------------------------------------------------------------------------------------------------------------------------------------------------------------------------------------------------------------------------------------------------------------------------------------------------------------------------------------------------------------------------------------------------------------------------------------------------------------------------------------------------------------------------------------------------------------------------------------------------------------------------------------------------------------------------------------------------|-------------------------------------------------------------------------------------------------------------------------------------------------------------------------------------------------------------------------------------------------------------------------------------------------------------------------------------------------------------------------------------------------------------------------------|------------------------------------------------------------------------------------------------------------------------------------------------------------------------------------------------------------------------------------------------------------------------------------------------------------------------------------------------------------------------------------------------------------------------------------------------------------|
| <b>History of:</b> <input type="checkbox"/> Hypertension <input type="checkbox"/> Diabetes <input type="checkbox"/> COPD <input type="checkbox"/> HIV<br><input type="checkbox"/> Other: _____ <input type="checkbox"/> None <input type="checkbox"/> Unknown<br><b>Current Medications:</b> _____ <input type="checkbox"/> None <input type="checkbox"/> Unknown<br><b>Past Surgeries:</b> _____ <input type="checkbox"/> None <input type="checkbox"/> Unknown<br><b>Any Known Allergies:</b> _____ <input type="checkbox"/> None <input type="checkbox"/> Unknown                                                                                                                                                                                                                                                                                          |                                                                                                                                                                                                                                                                                                                                                                                                                               | <b>Pregnant:</b> <input type="checkbox"/> Yes <input type="checkbox"/> No <input type="checkbox"/> Not Applicable (N/A)<br><b>Vaccinations up to date?</b> <input type="checkbox"/> Yes <input type="checkbox"/> No _____<br><b>Substance Use:</b> <input type="checkbox"/> Tobacco <input type="checkbox"/> Alcohol <input type="checkbox"/> Drugs <input type="checkbox"/> IV Drugs<br><b>Safe at home?</b> _____                                        |
| PHYSICAL EXAMINATION (SECONDARY SURVEY)                                                                                                                                                                                                                                                                                                                                                                                                                                                                                                                                                                                                                                                                                                                                                                                                                       |                                                                                                                                                                                                                                                                                                                                                                                                                               |                                                                                                                                                                                                                                                                                                                                                                                                                                                            |
| <input type="checkbox"/> NORMAL                                                                                                                                                                                                                                                                                                                                                                                                                                                                                                                                                                                                                                                                                                                                                                                                                               | General                                                                                                                                                                                                                                                                                                                                                                                                                       | Label any details of injury<br>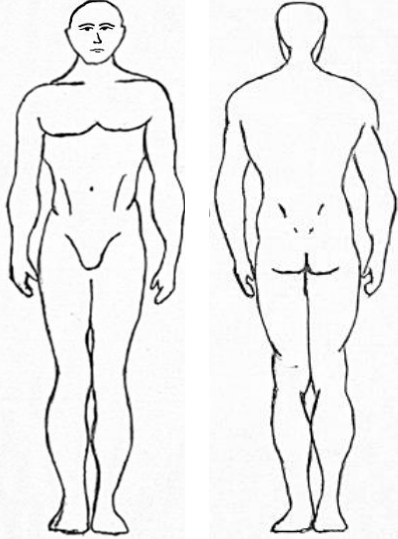                                                                                                                                                                                                                                                                                                                                         |
| <input type="checkbox"/> NORMAL                                                                                                                                                                                                                                                                                                                                                                                                                                                                                                                                                                                                                                                                                                                                                                                                                               | Head, Eyes, Ears<br>Nose and Throat<br>(HEENT)                                                                                                                                                                                                                                                                                                                                                                                |                                                                                                                                                                                                                                                                                                                                                                                                                                                            |
| <input type="checkbox"/> NORMAL                                                                                                                                                                                                                                                                                                                                                                                                                                                                                                                                                                                                                                                                                                                                                                                                                               | Neuro Exam                                                                                                                                                                                                                                                                                                                                                                                                                    |                                                                                                                                                                                                                                                                                                                                                                                                                                                            |
| <input type="checkbox"/> NORMAL                                                                                                                                                                                                                                                                                                                                                                                                                                                                                                                                                                                                                                                                                                                                                                                                                               | Neck                                                                                                                                                                                                                                                                                                                                                                                                                          |                                                                                                                                                                                                                                                                                                                                                                                                                                                            |
| <input type="checkbox"/> NORMAL                                                                                                                                                                                                                                                                                                                                                                                                                                                                                                                                                                                                                                                                                                                                                                                                                               | Respiratory                                                                                                                                                                                                                                                                                                                                                                                                                   |                                                                                                                                                                                                                                                                                                                                                                                                                                                            |
| <input type="checkbox"/> NORMAL                                                                                                                                                                                                                                                                                                                                                                                                                                                                                                                                                                                                                                                                                                                                                                                                                               | Cardiovascular                                                                                                                                                                                                                                                                                                                                                                                                                |                                                                                                                                                                                                                                                                                                                                                                                                                                                            |
| <input type="checkbox"/> NORMAL                                                                                                                                                                                                                                                                                                                                                                                                                                                                                                                                                                                                                                                                                                                                                                                                                               | Abdominal                                                                                                                                                                                                                                                                                                                                                                                                                     |                                                                                                                                                                                                                                                                                                                                                                                                                                                            |
| <input type="checkbox"/> NORMAL                                                                                                                                                                                                                                                                                                                                                                                                                                                                                                                                                                                                                                                                                                                                                                                                                               | Pelvis                                                                                                                                                                                                                                                                                                                                                                                                                        |                                                                                                                                                                                                                                                                                                                                                                                                                                                            |
| <input type="checkbox"/> NORMAL                                                                                                                                                                                                                                                                                                                                                                                                                                                                                                                                                                                                                                                                                                                                                                                                                               | Genital urinary                                                                                                                                                                                                                                                                                                                                                                                                               |                                                                                                                                                                                                                                                                                                                                                                                                                                                            |
| <input type="checkbox"/> NORMAL                                                                                                                                                                                                                                                                                                                                                                                                                                                                                                                                                                                                                                                                                                                                                                                                                               | Back exam                                                                                                                                                                                                                                                                                                                                                                                                                     |                                                                                                                                                                                                                                                                                                                                                                                                                                                            |
| <input type="checkbox"/> NORMAL                                                                                                                                                                                                                                                                                                                                                                                                                                                                                                                                                                                                                                                                                                                                                                                                                               | Musculoskeletal                                                                                                                                                                                                                                                                                                                                                                                                               |                                                                                                                                                                                                                                                                                                                                                                                                                                                            |
| EU PLAN AND INTERVENTIONS                                                                                                                                                                                                                                                                                                                                                                                                                                                                                                                                                                                                                                                                                                                                                                                                                                     |                                                                                                                                                                                                                                                                                                                                                                                                                               |                                                                                                                                                                                                                                                                                                                                                                                                                                                            |
| <b>Fluids and Medications Given at EU</b><br><input type="checkbox"/> IV Fluids: <input type="checkbox"/> NS _____ mL   <input type="checkbox"/> RL _____ mL   <input type="checkbox"/> _____ mL <input type="checkbox"/> None given<br><input type="checkbox"/> Blood Transfusion <input type="checkbox"/> WB _____ U   <input type="checkbox"/> PRBC _____ U   <input type="checkbox"/> Others _____ U <input type="checkbox"/> None given<br><input type="checkbox"/> Analgesia _____ <input type="checkbox"/> None given<br>_____<br><input type="checkbox"/> Antibiotics _____ <input type="checkbox"/> None given<br>_____<br><input type="checkbox"/> Tetanus toxoid _____ <input type="checkbox"/> None given<br><input type="checkbox"/> Sedation and Paralytics: _____ <input type="checkbox"/> None given<br><input type="checkbox"/> Other: _____ |                                                                                                                                                                                                                                                                                                                                                                                                                               | <b>EU Procedures done</b><br><input type="checkbox"/> Splinting: _____<br><input type="checkbox"/> Fracture Reduction _____<br><input type="checkbox"/> Pelvic Stabilisation on: _____<br><input type="checkbox"/> Foreign Body Removal: _____<br><input type="checkbox"/> Simple / Complex Laceration Repair: _____<br><input type="checkbox"/> Intubation: _____<br><input type="checkbox"/> Chest Tube: _____<br><input type="checkbox"/> Others: _____ |
| LABORATORY TEST AND RESULTS                                                                                                                                                                                                                                                                                                                                                                                                                                                                                                                                                                                                                                                                                                                                                                                                                                   | RADIOLOGICAL/IMAGING INVESTIGATIONS AND RESULTS                                                                                                                                                                                                                                                                                                                                                                               |                                                                                                                                                                                                                                                                                                                                                                                                                                                            |
| <input type="checkbox"/> Urine for pregnancy <input type="checkbox"/> Not done <input type="checkbox"/> posi. ve <input type="checkbox"/> Nega. ve<br><input type="checkbox"/> Haemoglobin: _____ g/dl <input type="checkbox"/> pending <input type="checkbox"/> Not done<br><input type="checkbox"/> Blood grouping: _____ <input type="checkbox"/> pending <input type="checkbox"/> Not done<br><input type="checkbox"/> Others: _____                                                                                                                                                                                                                                                                                                                                                                                                                      | <input type="checkbox"/> X-Ray of _____<br><input type="checkbox"/> Pneumothorax <input type="checkbox"/> Pleural Fluid <input type="checkbox"/> Rib Fracture <input type="checkbox"/> Pulmonary Opacity<br><input type="checkbox"/> C-spine fracture <input type="checkbox"/> Extremity Fracture <input type="checkbox"/> Pelvic Fracture<br><input type="checkbox"/> Wide medias. num <input type="checkbox"/> Other: _____ |                                                                                                                                                                                                                                                                                                                                                                                                                                                            |
| <b>FINAL CASUALTY DIAGNOSIS: 1:</b> _____ <b>2:</b> _____<br><b>3:</b> _____ <b>Number of serious injures (circle):</b> 0 or 1 or ≥ 2                                                                                                                                                                                                                                                                                                                                                                                                                                                                                                                                                                                                                                                                                                                         |                                                                                                                                                                                                                                                                                                                                                                                                                               |                                                                                                                                                                                                                                                                                                                                                                                                                                                            |
| <b>CASUALTY CONSULTATION:</b> <input type="checkbox"/> None needed <input type="checkbox"/> Done to: _____<br>Recommendation from consult: _____                                                                                                                                                                                                                                                                                                                                                                                                                                                                                                                                                                                                                                                                                                              |                                                                                                                                                                                                                                                                                                                                                                                                                               |                                                                                                                                                                                                                                                                                                                                                                                                                                                            |
| <b>FINAL CASUALTY REASSESSMENT at _____: _____ (24h format) BP: _____ / _____ HR: _____ RR: _____ SpO<sub>2</sub>: _____ % on _____ Temp: _____ °C</b><br><b>PATIENT CONDITION:</b> <input type="checkbox"/> Same <input type="checkbox"/> Changed: _____                                                                                                                                                                                                                                                                                                                                                                                                                                                                                                                                                                                                     |                                                                                                                                                                                                                                                                                                                                                                                                                               |                                                                                                                                                                                                                                                                                                                                                                                                                                                            |
| <input type="checkbox"/> ADMITTED TO: <input type="checkbox"/> Ward _____ <input type="checkbox"/> ICU <input type="checkbox"/> Operating Theatre<br><input type="checkbox"/> REFERRED to: _____<br><input type="checkbox"/> DAMA                                                                                                                                                                                                                                                                                                                                                                                                                                                                                                                                                                                                                             |                                                                                                                                                                                                                                                                                                                                                                                                                               | <input type="checkbox"/> DISCHARGE HOME<br><input type="checkbox"/> DIED OF _____                                                                                                                                                                                                                                                                                                                                                                          |
| Name of the attending Clinician                                                                                                                                                                                                                                                                                                                                                                                                                                                                                                                                                                                                                                                                                                                                                                                                                               | Cadre (MD, AMO, CO, Intern)                                                                                                                                                                                                                                                                                                                                                                                                   | Signature and Date and time                                                                                                                                                                                                                                                                                                                                                                                                                                |
|                                                                                                                                                                                                                                                                                                                                                                                                                                                                                                                                                                                                                                                                                                                                                                                                                                                               |                                                                                                                                                                                                                                                                                                                                                                                                                               | _____ / _____ / _____   : hrs                                                                                                                                                                                                                                                                                                                                                                                                                              |
